# 1 Crowding-induced phase separation 2 of nuclear transport receptors in FG 3 nucleoporin assemblies

4 **Luke K. Davis**<sup>1,2,3,¶\*</sup>, **Ian J. Ford**<sup>1,2,3</sup>, **Bart W. Hoogenboom**<sup>1,2,3,\*</sup>

**\*For correspondence:**

5 [luke.davis@uni.lu](mailto:luke.davis@uni.lu) (LKD);  
6 [b.hoogenboom@ucl.ac.uk](mailto:b.hoogenboom@ucl.ac.uk) (BWH)

**Present address:** ¶Department of  
7 Physics and Materials, University  
8 of Luxembourg, Luxembourg

1 Department of Physics and Astronomy, University College London, London, United  
2 Kingdom; 2Institute for the Physics of Living Systems, University College London,  
3 London, United Kingdom; 3London Centre for Nanotechnology, University College  
4 London, London, United Kingdom

---

## 10 Abstract

11 The rapid (< 1 ms) transport of biological material to and from the cell nucleus is regulated by the  
12 nuclear pore complex (NPC). At the core of the NPC is a permeability barrier consisting of  
13 intrinsically disordered Phe-Gly (FG) nucleoporins (FG Nups). Various types of nuclear transport  
14 receptors (NTRs) facilitate transport by partitioning in the FG Nup assembly, overcoming the  
15 barrier by their affinity to the FG Nups, and comprise a significant fraction of proteins in the NPC  
16 barrier. In previous work, we revealed that the experimental binding of the NTRs NTF2 and – the  
17 larger – Imp $\beta$  to different planar assemblies of FG Nups follows a universal physical law defined  
18 by negative cooperativity, which was further validated by a minimal physical model that treated  
19 the FG Nups as flexible homopolymers and the NTRs as uniformly cohesive spheres *Zahn et al.*  
20 (2016). Here, we build upon our original study by first parametrizing our model to experimental  
21 data, and next to predict the effects of crowding by different types of NTRs. We show how varying  
22 the amounts of one type of NTR modulates how the other NTR penetrates the FG Nup assembly.  
23 Notably, at similar and physiologically relevant NTR concentrations, our model predicts demixed  
24 phases of NTF2 and Imp $\beta$  within the FG Nup assembly. The functional implication of NTR phase  
25 separation is that NPCs may sustain separate transport pathways that are determined by  
26 inter-NTR competition.

---

## 28 Introduction

29 Embedded in the nuclear envelope are nuclear pore complexes (NPCs), large hour-glass shaped  
30 channels (inner diameter  $\sim$  40 nm) that regulate biomolecular transport between the cytoplasm  
31 and nucleoplasm *Alberts (1994); Wente (2000)*. The NPC presents an exclusion barrier to inert  
32 molecules, with the degree of exclusion increasing with molecular size. This physical barrier arises  
33 from a dense (mass density 100-300 mg/ml) assembly of moderately cohesive intrinsically dis-  
34 ordered Phenylalanine-Glycine nucleoproteins (FG Nups) *Ghavami et al. (2014)*. In addition, the bar-  
35 rier contains relatively high numbers ( $\sim$  20–100) of nuclear transport receptors (NTRs), globular  
36 proteins that facilitate the translocation of cargo by transiently binding to the FG Nups *Lowe et al.*  
37 (2015); *Kim et al. (2018)*; *Hayama et al. (2018)*. Despite the known roles that NTRs have in nu-  
38 cleocytoplasmic transport, for instance ferrying specific cargo in and/or out of the nucleoplasm,  
39 returning RanGTP to the cytoplasm, and enhancing the exclusion of inert molecules *Jovanovic-*  
40 *Talisman et al. (2009)*; *Aitchison and Rout (2012)*; *Lowe et al. (2015)*; *Jovanovic-Talisman and Zil-*

41 *man* (2017); *Kapinos et al.* (2017), it remains to be fully elucidated how different NTRs organize  
42 themselves within the permeability barrier itself and how this organization affects transport *Stan-*  
43 *ley et al.* (2017); *Jovanovic-Talisman and Zilman* (2017); *Hoogenboom et al.* (2021).

44 On the one hand, increasing the amount of different NTRs improves the performance of the nu-  
45 cleocytoplasmic machinery, on the other hand NTRs occupy volume which could lead to jamming  
46 in the channel. One possible explanation for how the NPC solves this problem is by modulation  
47 of the FG Nup transport barrier by NTRs or by the “separate transport pathway” hypothesis, ac-  
48 cording to which NTRs and/or cargoes may take different trajectories through the barrier, which  
49 could be determined through the differential binding of specific FG Nup – NTR pairings or spatial  
50 segregation of material in the channel *Shah and Forbes* (1998); *Yang and Musser* (2006); *Naim et al.*  
51 (2007); *Fiserova et al.* (2010); *Yamada et al.* (2010); *Ma et al.* (2012); *Kapinos et al.* (2014); *Lowe et al.*  
52 (2015); *Lim et al.* (2015); *Ma et al.* (2016); *Kapinos et al.* (2017). An alternative mechanism, involving  
53 the switching between import and export transport states, has also been proposed *Kapon et al.*  
54 (2008). Despite these proposals, and other candidates, there is, as yet, no definitive consensus  
55 on how the NPC maintains high-throughput transport in the presence of large numbers of NTRs  
56 *Hoogenboom et al.* (2021).

57 It is difficult to test different hypotheses regarding how NTR crowding affects the NPC barrier  
58 in an *in-vivo* setting, due to the complexity of probing the intact NPC where a multitude of diverse  
59 proteins are present in a dense nanoscale channel. To circumvent this complexity, various stud-  
60 ies have reverted to much simpler *in-vitro* FG Nup and NTR assemblies that resemble the physical  
61 environment of the NPC. Particularly well-controlled model systems are FG Nup polymer film as-  
62 semblies, where copies of an FG Nup are anchored to a planar surface and NTRs (typically of one  
63 type) are introduced in the bulk volume above the surface *Eisele et al.* (2010); *Schoch et al.* (2012);  
64 *Eisele et al.* (2012); *Kapinos et al.* (2014); *Zahn et al.* (2016); *Vovk et al.* (2016). For the behaviour  
65 of planar films containing one type of FG Nup and one type of NTR, the main findings have been:  
66 1) that NTRs (such as NTF2 and – separately – Importin- $\beta$ ) bind to FG Nups in a rather generic way,  
67 suggesting possible universal physical principles – based on negative cooperative binding – gov-  
68 erning their behaviour *Vovk et al.* (2016); *Zahn et al.* (2016); 2) NTRs readily penetrate the FG Nup  
69 films, with only limited effects on the collective morphology of the FG Nups (little swelling or com-  
70 paction) *Eisele et al.* (2010); *Kapinos et al.* (2014); *Wagner et al.* (2015); *Vovk et al.* (2016); *Zahn et al.*  
71 (2016); 3) that such systems can replicate the basic selective mechanism in the NPC, *i.e.*, inert pro-  
72 teins tend not to penetrate the collective FG Nup phases but NTRs do, consistent with *in-vivo* NPC  
73 functionality and with experiments on bulk solutions of FG Nups and NTRs (*Schmidt and Görlich,*  
74 *2015; Schmidt and Görlich, 2016*); 4) the number of transport proteins in the FG Nup films can vary  
75 by orders of magnitude as a function of NTR numbers in solution above the film, in a highly non-  
76 Langmuir manner, where complex many-body interactions preclude the use of simple one-to-one  
77 binding models *Eisele et al.* (2010); *Schoch et al.* (2012); *Kapinos et al.* (2014); *Wagner et al.* (2015);  
78 *Vovk et al.* (2016); *Zahn et al.* (2016). With the caveat that only a subset of NTRs have been probed,  
79 investigations of planar assemblies of FG Nups and NTRs highlight the fine-tuned balance of FG  
80 Nup attachment density, FG Nup-NTR affinities, and NTR concentrations, where minor changes  
81 in this balance can lead to qualitatively different binding scenarios *Vovk et al.* (2016); *Zahn et al.*  
82 (2016); *Stanley et al.* (2017).

83 Building on previous findings restricted to one-type of NTR, one can then ask: how does the  
84 binding of a specific NTR to a planar assembly of FG Nups depend on the presence of other NTRs?  
85 Here, we aim to provide answers to this question, using physical modelling to probe how the bind-  
86 ing of one type of NTR could be affected by other types, in a way that can be tested by currently  
87 available experimental setups for planar assemblies of FG Nups. To explore the effects of mixed  
88 NTR crowding, we model a ternary mixture containing two different NTRs and one type of FG Nup in  
89 a polymer film assembly. When modelling FG Nups and NTRs, one can take various coarse-grained  
90 approaches, for instance one can take an all-atom approach *Miao and Schulten* (2009); *Gamini et al.*  
91 (2014); *Raveh et al.* (2016), or account only for the amino acids (*Ghavami et al., 2012, 2014, 2018*), or

work only with the generic patterning of FG/hydrophobic/hydrophilic/charged “patches” *Tagliazuchi and Szleifer (2015); Davis et al. (2021)*, or completely neglect sequence details altogether in an “homopolymer” approach *Moussavi-Baygi et al. (2011); Osmanović et al. (2012, 2013b); Vovk et al. (2016); Zahn et al. (2016); Timney et al. (2016); Davis et al. (2020)*. Each approach has its strengths and weaknesses. For instance higher resolution modelling can account for greater molecular complexity, but with the difficulty in probing large time and length scales in contrast to homopolymer modelling where, at the expense of resolution, large time and length scales are accessible in conjunction with more robust parameterization and simplicity of execution. In this work, we build on our previous minimal modelling framework based on treating FG Nups as sticky and flexible homopolymers and NTRs as uniformly cohesive spheres *Osmanović et al. (2013b); Zahn et al. (2016); Davis et al. (2020)*.

### Computational Model

As in previous works *Osmanović et al. (2013b); Zahn et al. (2016); Davis et al. (2020)*, we use classical density functional theory (DFT), an equilibrium mean field theory, to model the FG Nup-NTR planar film assembly. In this work we focus solely on the effects of mixing different types of NTRs in an FG Nup film assembly, the simplest scenario being that of two types of NTRs and one type of FG Nup. Specifically, the model consists of a ternary mixture, *i.e.*, a  $\nu$ -component system with  $\nu = 3$ , containing two types of free particles (NTRs denoted by  $i = 1, 2$ ) and one type of polymer (FG Nups denoted by  $i = 3$ ). In this system, the numbers of the two different types of free particles (components  $i = 1, 2$ ) are given as  $N^{(i)}$ , diameters are  $d^{(i)}$ , and chemical potentials are  $\mu^{(i)}$ . In addition to the free particles, there are  $N^{(i=3)} = 260$  flexible homopolymers each consisting of  $M = 300$  beads, where each bead has a diameter of  $d^{(3)} = 0.76$  nm (corresponding to two amino acids per bead). This choice of  $M$  and  $d^{(3)}$  produces the approximate contour and persistence length of an Nsp1 FG domain *Lim et al. (2006); Zahn et al. (2016); Hayama et al. (2019); Davis et al. (2020)*. The polymers are attached uniformly to a flat surface of area  $A = 88.62 \times 88.62$  nm<sup>2</sup>, resulting in an attachment/grafting density of  $\approx 3.3$  polymers/100 nm<sup>2</sup>, which is in line with the densities in the native NPC and in *in-vitro* experiments *Zahn et al. (2016); Davis et al. (2020)*. It is assumed that the system is translationally symmetric along the directions parallel to the grafting surface, resulting in a 1D DFT theory where the densities only vary as a function of the height  $z$  above the surface *Davis et al. (2020)*.

Furthermore, the grand potential free energy functional  $\Omega$  that provides a complete thermodynamic description of the entire system can be written as a sum of terms

$$\Omega = \mathcal{F}_{\text{ideal-gas}} + \mathcal{F}_{\text{ideal-polymer}} + \mathcal{F}_{\text{mean-field}} + \mathcal{F}_{\text{external}} + \mathcal{F}_{\text{exchange}} + \mathcal{F}_{\text{cohesion}} + \mathcal{F}_{\text{hard-sphere}}. \quad (1)$$

The term  $\mathcal{F}_{\text{ideal-gas}} = \beta^{-1} \sum_{i=1}^{\nu} \int dz \rho^{(i)}(z) (\ln(\lambda^{(i)} \rho^{(i)}(z)) - 1)$  is the free energy of a set of  $\nu$  ideal gases, where  $\beta = 1/k_B T$  ( $k_B$  is Boltzmann’s constant) and  $\lambda^{(i)}$  is the appropriate thermal de Broglie wavelength for component  $i$ . The term  $\mathcal{F}_{\text{ideal-polymer}} = N^{(3)} \beta^{-1} \ln(Z_c[w(z)])$  describes the ideal polymer free energy (in the presence of a mean field  $w(z)$ ) where the canonical partition function is written as

$$Z_c[w(z)] = \frac{1}{N!(\lambda^{(3)})^N} \int dz^N \exp \left[ -\beta U(\{z\}) - \int dz w(z) \hat{\rho}^{(3)}(z) \right], \quad (2)$$

where  $N = M \times N^{(3)}$ ,  $\{z\}$  is the set of all positions,  $U(\{z\})$  is the total potential energy, and  $\hat{\rho}^{(3)}(z) = \sum_{k=1}^{N^{(3)}} \sum_{j=1}^M \delta(z - z_{kj})$  is a microscopic polymer bead density (where  $z_{kj}$  is the height of the  $j$ th bead belonging to polymer  $k$ ).  $\mathcal{F}_{\text{mean-field}}$  is the additional term from introducing a polymer mean field,  $\mathcal{F}_{\text{external}}$  accounts for the external potential imposing the hardness of the anchoring surface,  $\mathcal{F}_{\text{exchange}}$  accounts for the exchange of NTRs with an external reservoir,  $\mathcal{F}_{\text{cohesion}}$  is the free energy contribution

from inter- and intra-molecular attractive (“cohesive”) interactions, and  $\mathcal{F}_{\text{hard-sphere}}$  accounts for the inter- and intra-molecular excluded volume interactions, including imposing polymer chain connectivity. Thus, the dimensionless grand potential can be written more explicitly as

$$\begin{aligned} \beta\Omega = & \sum_{i=1}^2 \int dz \rho^{(i)}(z) (\ln(\lambda^{(i)} \rho^{(i)}(z)) - 1) - N^{(3)} \ln(Z_C[w]) - \int dz w(z) \rho^{(3)}(z) \\ & + \beta \sum_{i=1}^2 \int dz \rho^{(i)}(z) (V_{\text{ext}}^{(i)}(z) - \mu^{(i)}) + \beta \int dz \rho^{(3)}(z) V_{\text{ext}}^{(3)}(z) + \beta \frac{1}{2} \sum_{i=1}^3 \int \int \rho^{(i)}(z) \rho^{(i)}(z') u^{ii}(z-z') dz dz' \\ & + \beta \sum_{i=1}^2 \sum_{j=i+1}^3 \int \int \rho^{(i)}(z) \rho^{(j)}(z') u^{ij}(z-z') dz dz' + \int dz (\phi^{WB}(n_\alpha(z), \mathbf{n}_\alpha(z)) + \phi^{CH}(n_\alpha^{(3)}(z), \mathbf{n}_\alpha(z))), \end{aligned} \quad (3)$$

where  $\rho^{(i)}(z)$  is the number density profile of component  $i$ ,  $V_{\text{ext}}^{(i)}(z)$  is the external potential representing the surface,  $\mu^{(i)}$  is the chemical potential for component  $i$ ,  $u^{ij}(z)$  is a one-dimensional pair potential defined between components  $i$  and  $j$ ,  $\phi^{WB}$  and  $\phi^{CH}$  are the White bear (hard-sphere) **Roth et al. (2002)** and chain connectivity functionals **Yu and Wu (2002)** given by the equations

$$\phi^{WB} = -n_0 \ln(1 - n_3) + \frac{n_1 n_2 - \mathbf{n}_1 \cdot \mathbf{n}_2}{1 - n_3} + (n_2^3 - 3n_2 n_2^2) \frac{n_1 + (1 - n_3)^2 \ln(1 - n_3)}{36\pi n_3^2 (1 - n_3)^2}, \quad (4a)$$

$$\phi^{CH} = \left( \frac{1 - M}{M} \right) n_0 \left( 1 - \frac{n_2^2}{n_2^2} \right) \ln \left( \frac{1}{1 - n_3} + \frac{n_2 R (1 - \frac{n_2^2}{n_2^2})}{2(1 - n_3)^2} + \frac{n_1 R^2 (1 - \frac{n_2^2}{n_2^2})}{18(1 - n_3)^3} \right), \quad (4b)$$

124 where  $n_\alpha(z; \{\rho^{(i)}\})$  and  $\mathbf{n}_\alpha(z; \{\rho^{(i)}\})$  are, respectively, the one-dimensional scalar and vectorial weighted  
125 densities and  $R$  is the radius of a polymer bead (see **Roth (2010)** and **Davis et al. (2020)**).

126 The hardness of the flat surface is imposed via a Weeks-Chandler-Anderson potential

$$V_{\text{ext}}^{(i)}(z) = \begin{cases} 4\epsilon_{\text{ext}} \left[ \left( \frac{\sigma^{(i)}}{z} \right)^{12} - \left( \frac{\sigma^{(i)}}{z} \right)^6 \right] + \epsilon_{\text{ext}}, & z < d^{(i)}, \\ 0, & z \geq d^{(i)}, \end{cases} \quad (5)$$

127 where  $\epsilon_{\text{ext}} = 20 k_B T$  is the maximum energy barrier of the wall (chosen sufficiently high so that  
128 the number density of all components is zero at and below the surface) and  $\sigma^{(i)} = 2^{-1/6} d^{(i)}$ . Con-  
129 sistent with our previous work **Davis et al. (2021)**, the intramolecular and intermolecular cohesive  
130 interactions are based upon the Morse potential (in three dimensions)

$$u_{3D}^{(ij)}(r) = \epsilon^{(ij)} \left( e^{-2\alpha(r-d^{(ij)})} - 2e^{-\alpha(r-d^{(ij)})} \right), \quad (6)$$

131 where  $r$  is the distance between two particles of type  $i$  and type  $j$ ,  $\epsilon^{(ij)}$  is the cohesion strength,  $\alpha =$   
132  $6.0 \text{ nm}^{-1}$  is an inverse decay length of the pair potential, and  $d^{(ij)} = \frac{1}{2}(d^{(i)} + d^{(j)})$ . The potential above,  
133 valid in three spatial dimensions, is then integrated over the plane, henceforth only depending on  
134  $z$ , and shifted such that – the now one-dimensional pair potential –  $u^{(ij)}(z \geq 2d^{(ij)}) = 0 k_B T$  so as to  
135 keep the cohesive interactions short ranged.

To find the set of density distributions – for the particles and polymer – and the polymer mean field in the equilibrium state, the following equations must be solved self-consistently

$$\frac{\beta \delta \Omega}{\delta w} = \int dz \left[ -w(z) + c^{(3)}(z) + \beta \sum_{i=1}^3 \int \rho^{(i)}(z) u^{i3}(z-z') dz' + \beta V_{\text{ext}}^{(3)}(z) \right] \frac{\delta \rho^{(3)}[w(z)]}{\delta w(z'')} = 0, \quad (7a)$$

$$\frac{\beta \delta \Omega}{\delta \rho^{(i)}} = c^{(i)}(z) + \ln(\lambda^{(i)} \rho^{(i)}(z)) + \beta \sum_{j=1}^3 \int \rho^{(j)}(z) u^{ij}(z-z') dz' + \beta (V_{\text{ext}}^{(i)}(z) - \mu^{(i)}) = 0, \quad i = 1, 2 \quad (7b)$$

136 where the notation  $\frac{\delta}{\delta x}$  represents a functional derivative with respect to  $x$  and  $c^{(i)}$  is the one-body  
137 direct correlation function given by

$$c^{(i)}(z) = \beta \frac{\delta \mathcal{F}_{\text{hard-sphere}}[\rho^{(i)}]}{\delta \rho^{(i)}(z)} = \sum_{\alpha} \int dz' \frac{\delta \phi^{WB}}{\delta n_{\alpha}^{(i)}} \frac{\delta n_{\alpha}^{(i)}(z')}{\delta \rho^{(i)}(z)}, \quad i = 1, 2, \quad (8a)$$

$$c^{(3)}(z) = \beta \frac{\delta \mathcal{F}_{\text{hard-sphere}}[\rho^{(3)}]}{\delta \rho^{(3)}(z)} = \sum_{\alpha} \int dz' \frac{\delta(\phi^{WB} + \phi^{CH})}{\delta n_{\alpha}^{(3)}} \frac{\delta n_{\alpha}^{(3)}(z')}{\delta \rho^{(3)}(z)}. \quad (8b)$$

138

139 For the free particles one can decompose the chemical potential into two terms

$$\mu^{(i)} = -\beta^{-1} \ln \left( \frac{1}{(\lambda^{(i)}) \rho_{\text{bulk}}^{(i)}} \right) + \mu_{\text{exc}}^{(i)}, \quad i = \{1, 2\}, \quad (9)$$

140 where  $\rho_{\text{bulk}}^{(i)}$  is the bulk density of the free particles of component  $i$  and  $\mu_{\text{exc}}^{(i)}$  is the excess chemi-  
141 cal potential due to the inter- and intra-molecular interactions. One can solve equations (7) self-  
142 consistently by invoking a fictitious time variable  $t$ , where the solutions are found through an iter-  
143 ative procedure. This is expressed by the following

$$\frac{\partial w(z)}{\partial t} = -w(z) + c^{(3)}(z) + \beta \sum_{i=1}^3 \int \rho^{(i)}(z) u^{(i3)}(z - z') dz' + \beta V_{\text{ext}}^{(3)}(z), \quad (10a)$$

$$\frac{\partial \rho^{(i)}(z)}{\partial t} = -\rho^{(i)}(z) + \rho_{\text{bulk}}^{(i)} \exp \left( \beta \mu_{\text{exc}}^{(i)} + c^{(i)}(z) - \beta \sum_{j=1}^3 \int \rho^{(j)}(z) u^{(ij)}(z - z') dz' - \beta V_{\text{ext}}^{(i)}(z) \right), \quad i = 1, 2. \quad (10b)$$

144 Finally, discretizing space  $z$  into  $L$  slices of thickness  $\Delta z$  and discretizing fictitious time then  
145 yields the resulting discrete update rules which are solved numerically

$$w_{n+1}(z_j) = w_n(z_j) + \Delta t \left( -w_n(z_j) + c^{(3)}(z_j) + \beta \sum_{i=1}^3 \sum_{k=0}^L \rho^{(i)}(z_k) u^{(i3)}(z_k - z_j) \Delta z + \beta V_{\text{ext}}^{(3)}(z_j) \right), \quad (11a)$$

$$\rho_{n+1}^{(i)}(z_j) = \rho_n^{(i)}(z_j) - \Delta t \rho^{(i)}(z_j) + \Delta t \rho_{\text{bulk}}^{(i)} \exp \left( \beta \mu_{\text{exc}}^{(i)} + c^{(i)}(z_j) - \beta \sum_{m=1}^3 \sum_{k=0}^L \rho^{(m)}(z_k) u^{(im)}(z_k - z_j) \Delta z - \beta V_{\text{ext}}^{(i)}(z_j) \right), \quad (11b)$$

146 where  $z_k$  is the - midpoint - height above the surface of the spatial slice  $k$ ,  $n$  labels discrete time,  
147 and in the last equation  $i = 1, 2$ . The simulation parameters used here were  $L = 1024$ ,  $\Delta z = 0.117$  nm  
148 (with  $z_0 = 0.0585$ ), and  $\Delta t = 0.002$ .

## 149 Results

150 Minimal physical modelling facilitates the understanding of many aspects of NPC functionality in  
151 terms of general principles, but it requires quantitatively accurate parameter settings to make  
152 meaningful predictions *Osmanović et al. (2013a); Jovanovic-Talisman and Zilman (2017); Hoogen-*  
153 *boom et al. (2021)*. In this work the minimal modelling framework we employ is that of coarse-  
154 grained classical density functional theory (DFT), which has been previously used to model aspects  
155 of the NPC permeability barrier *Osmanović et al. (2012, 2013b); Zahn et al. (2016); Davis et al. (2020)*.  
156 To ensure that the setting of the parameters in our DFT model - outlined above - is commensurate  
157 with the behaviour of FG Nups and NTRs as probed in experiments, we make use of experimental  
158 data on FG Nup-NTR polymer film assemblies where the macroscopic binding between one type  
159 of FG Nup and one type of NTR was quantitatively probed (see Figure 1) *Zahn et al. (2016)*. The  
160 experiments focussed on a polymer film consisting of FG Nup (Nsp1) domains, attached to a flat  
161 surface at physiologically relevant densities ( $\approx 3.3$  polymers/100 nm<sup>2</sup>), interacting with one of the  
162 two following NTRs: NTF2, and Importin- $\beta$  (Imp $\beta$ ).

163 For consistency with the available experimental data we focus on the FG Nup Nsp1, which we  
 164 treat as a homogeneous, flexible, and cohesive polymer consisting of  $M = 300$  beads of diameter  
 165 0.76 nm (2 amino acids per bead), resulting in the approximately correct persistence length for FG  
 166 Nups *Lim et al. (2006)*; *Zahn et al. (2016)*; *Hayama et al. (2019)*; *Davis et al. (2020)*. The inter- and  
 167 intra-molecular cohesive properties of FG Nups arise from a combination of hydrophobic motifs,  
 168 e.g., FG, FxFG, and GLFG, and charged residues along the sequence which, in our model, are sub-  
 169 sumed into one essential cohesion parameter  $\epsilon_{\text{FG-FG}}$ . In addition to the FG Nups, we also include  
 170 the presence of the NTRs NTF2 and Imp $\beta$ , which we model as uniformly cohesive spheres of diam-  
 171 eters  $d_{\text{NTF2}} = 4$  nm and  $d_{\text{Imp}\beta} = 6$  nm respectively *Zahn et al. (2016)*. The cohesive properties of the  
 172 NTRs strictly refer to the attraction between the NTRs and FG Nups, arising at least in part from the  
 173 hydrophobic grooves and charged regions on the former and the hydrophobic motifs and charged  
 174 regions on the latter *Kumeta et al. (2012)*; *Kim et al. (2013)*; *Hayama et al. (2018)*; *Frey et al. (2018)*.  
 175 Following previous work *Zahn et al. (2016)*; *Vovk et al. (2016)*, we do not consider any cohesion  
 176 between NTRs themselves. As with the FG Nup inter- and intra-molecular cohesive interactions,  
 177 we subsume all contributions to the respective cohesive interactions FG Nup – NTF2 and FG Nup –  
 178 Imp $\beta$  through two more cohesion parameters  $\epsilon_{\text{FG-NTF2}}$  and  $\epsilon_{\text{FG-Imp}\beta}$ .

We begin the parametrization of our model with the setting of  $\epsilon_{\text{FG-FG}}$  so as to accurately repro-  
 duce the experimental thickness of Nsp1 planar film assemblies, at similar anchoring densities,  
 as was done previously *Zahn et al. (2016)*; *Fisher et al. (2018)*; *Davis et al. (2020)* (see Figure 1-  
 Figure supplement 1). With the here chosen interaction potential, the resulting cohesion strength  
 is  $\epsilon_{\text{FG-FG}} = 0.275 \pm 0.025 k_{\text{B}}T$  (with experiments conducted at  $\approx 23$  °C), which yields a film thickness  
 $\tau = 26 \pm 2$  nm, in our model defined as the height above the surface below which 95% of the total  
 polymer density is included. We note that the value of  $\epsilon_{\text{FG-FG}}$  found here is different to that of our  
 previous work *Zahn et al. (2016)*, which is due to the different choices of interaction potential and  
 geometry of the film assembly, but both models are parametrized using the same experimental  
 data and produce the same film thicknesses. To further validate this value of  $\epsilon_{\text{FG-FG}}$ , we checked  
 whether the polymer film would exclude inert molecules, a basic property that has been observed  
 for Nsp1 assemblies (*Schmidt and Görlich, 2015*; *Schmidt and Görlich, 2016*). The inert molecules  
 are modelled as non-cohesive spheres of diameter  $d^{(i)}$ , with  $i$  labelling the particle type, and their  
 inclusion/exclusion in the film is quantified through the potential of mean force (PMF)  $W^{(i)}(z)$  given  
 as

$$W^{(i)}(z) = c^{(i)}(z) + V_{\text{ext}}^{(i)}(z) + \int \rho^{(3)}(z)u^{(i)}(z-z')dz' - \mu^{(i)},$$

$$\approx -k_{\text{B}}T \ln \left( \frac{\rho^{(i)}(z)}{\rho_{\text{bulk}}^{(i)}} \right), \quad (12)$$

179 where  $i$  denotes a particle type,  $c^{(i)}(z)$  is the one-body direct correlation function (see equation  
 180 8),  $V_{\text{ext}}^{(i)}(z)$  is the external potential (see equation 5),  $\rho^{(3)}(z)$  is the polymer number density,  $u^{(i)}(z)$  is  
 181 the one-dimensional (integrated over the  $x - y$  plane) polymer-particle cohesive pair potential (see  
 182 equation 6), and  $\mu_{\text{exc}}^{(i)}$  is the excess chemical potential (here set to 0  $k_{\text{B}}T$ ) *Roth et al. (2000)*; *Roth and*  
 183 *Kinoshita (2006)*. For the inert molecules, the polymer-particle attraction (third term in equation  
 184 (12)) is nullified. As expected, non-cohesive particles with increasing diameters (1.0, 2.0, 4.0, and  
 185 6.0 nm) experience a greater potential barrier upon attempted entry into the polymer film (see  
 186 Figure 1-Figure supplement 2), confirming that our simple model of an Nsp1 film replicates one of  
 187 the key characteristics of the permeability barrier as seen in the NPC: the degree of exclusion of  
 188 inert molecules increasing with molecular size *Mohr et al. (2009)*; *Popken et al. (2015)*; *Ghavami*  
 189 *et al. (2016)*. We note that the presence of a maximum, close to the anchoring surface, in the  
 190 relative density for inert particle diameters  $d = 1$  and 2 nm is due to the decrease in the polymer  
 191 density closer to the surface (consistent with a small potential well close to the surface see Figure 1-  
 192 Figure supplement 2b); the appearance of the maxima in the density depends upon the anchoring  
 193 density of the FG Nups (not shown here). With the energy of thermal fluctuations  $k_{\text{B}}T$  as a reference

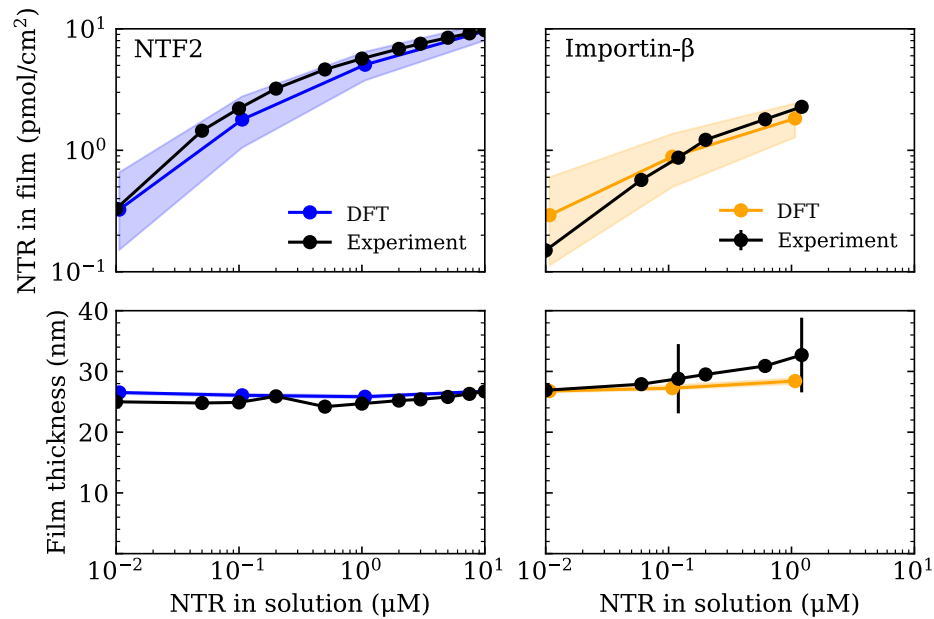

**Figure 1.** Setting the polymer-particle cohesion strengths  $\{\epsilon_{FG-NTF2}, \epsilon_{FG-Importin\beta}\}$  through comparison of DFT results with experimental binding isotherms for the cases of NTF2 (left) and Importin- $\beta$  (right) binding to an Nsp1 film *Zahn et al. (2016)* (top). Concomitant film thicknesses as found in DFT and experiment (bottom). The experimental Nsp1 surface attachment densities were  $4.9 \text{ pmol/cm}^2$  and  $5.1 \text{ pmol/cm}^2$  for NTF2 and Importin- $\beta$  respectively. The parametrized cohesion strengths  $\epsilon_{FG-NTF2} = 2.4 \pm 0.1 k_B T$  and  $\epsilon_{FG-Importin\beta} = 2.3 \pm 0.1 k_B T$  correspond to the modelled NTF2 and Importin- $\beta$  particles respectively. Filled bands (in all four panels) denote a tolerance of  $\pm 0.1 k_B T$  in the polymer-particle cohesion strengths. The thicknesses of the filled bands for the bottom two panels is similar to the thickness of the line connecting DFT data points (blue and orange).

**Figure 1-Figure supplement 1.** Parameterizing the polymer cohesion strength  $\epsilon_{FG-FG}$ .

**Figure 1-Figure supplement 2.** Inert particles of growing size do not penetrate the polymer film.

194 point, PMFs of the order of  $k_B T$  are compatible with passive entry and exit whilst PMFs at least one  
 195 order of magnitude greater than  $k_B T$  are indicative of a significant barrier. Hence we find that  
 196 inert particles with diameters  $\gtrsim 4 \text{ nm}$  experience a large free energy barrier to penetrate the FG  
 197 Nup assembly. This is quantitatively similar to previous experimental estimates of the “soft” size  
 198 selectivity  $d = 4.5 - 5.4 \text{ nm}$  of the NPC *Keminer and Peters (1999)*; *Paine et al. (1975)*; *Mohr et al.*  
 199 *(2009)*, and consistent with another simulation study which explicitly accounted for the amino acid  
 200 sequence of the FG Nups *Ghavami et al. (2016)*.

201 Having shown that the now parametrized polymer model for Nsp1 films replicates the experi-  
 202 mentally observed film thickness and the size selectivity of the NPC, we shift our focus to setting  
 203 the parameters for the NTRs NTF2 and Imp $\beta$ . The cohesion strengths  $\epsilon_{FG-NTF2}$  and  $\epsilon_{FG-Importin\beta}$  are set by  
 204 comparing absorption isotherms as calculated in DFT to those measured in experiment *Zahn et al.*  
 205 *(2016)* (see Figure 1). Using DFT, we compute the total density of NTRs in the film  $\Gamma^{(i)}$ ,  $i = \{1, 2\}$ , as  
 206 the total NTR population within the film thickness  $\tau$  divided by the area  $A$  (converted to units of  
 207  $\text{pmol/cm}^2$ )

$$\text{NTR areal density in film} = \Gamma^{(i)}[\rho^{(i)}(z); \tau] = A^{-1} \int_0^\tau \rho^{(i)}(z) dz, \quad (13)$$

208 where  $\rho^{(i)}(z)$  ( $i = \{1, 2\}$ ) is the number density of the NTRs. With only one free fitting parameter  
 209 for each NTR (for the NTR-FG Nup interaction strength), the DFT binding isotherms are found in  
 210 excellent agreement with experiment over 3 orders of magnitude in bulk NTR concentration (Figure  
 211 1 (top)), as was previously accomplished by a similar DFT model (where polymers were attached to  
 212 the base of a cylinder) in *Zahn et al. (2016)*. The resulting parametrized cohesion strengths – for the

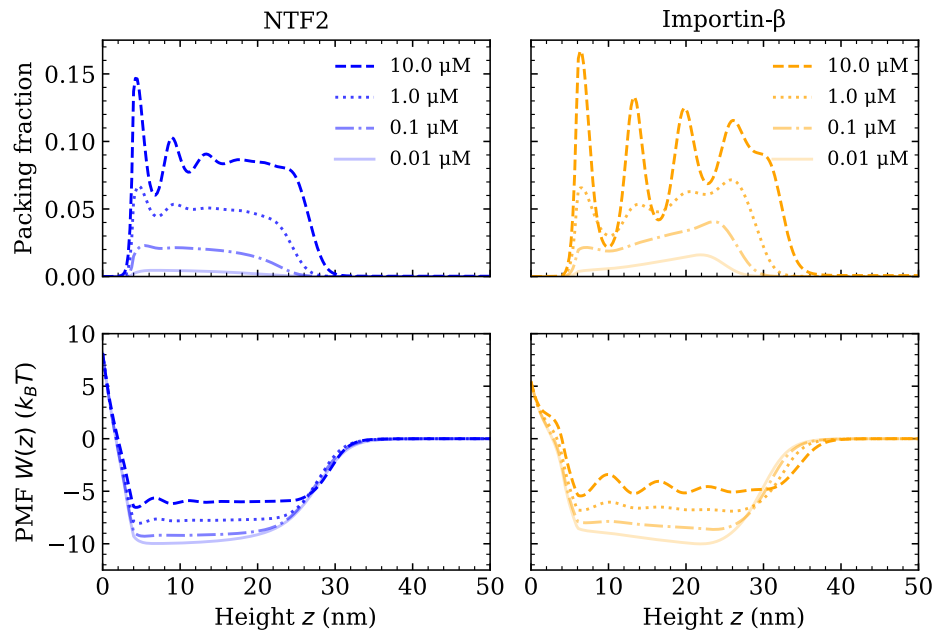

**Figure 2.** Increasing NTR bulk concentration increases packing and filling up of the potential well within the Nsp1 film, for systems containing one type of NTR only. Equilibrium DFT packing fractions  $\rho(z)d$ , where  $\rho(z)$  is the one-dimensional number density and  $d$  is the particle diameter, as a function of the height  $z$  above the flat surface for NTF2 (left) and Importin- $\beta$  (right), at various concentrations (top). Accompanying potentials of mean force  $W(z)$  (bottom), for the same systems as on the top row.

213 here chosen interaction potential – are  $\epsilon_{FG-NTF2} = 2.4 \pm 0.1 k_B T$  and  $\epsilon_{FG-Importin\beta} = 2.3 \pm 0.1 k_B T$  for NTF2  
 214 and Imp $\beta$  respectively. One might notice that  $\epsilon_{FG-NTF2} \approx \epsilon_{FG-Importin\beta}$  for the two (model) NTRs, despite  
 215 the Imp $\beta$  particle having an 1.5-fold larger excluded-volume diameter as compared with the NTF2  
 216 particle. However, given the differences in diameters, and therefore a difference in the respective  
 217 ranges of intermolecular interactions (see equation 6), we caution against directly comparing the  
 218 cohesive properties of the two NTRs based on the cohesion strengths  $\epsilon_{FG-NTF2}$  and  $\epsilon_{FG-Importin\beta}$  alone. Of  
 219 note, the concomitant film thicknesses from DFT – as a function of NTR concentration – are also in  
 220 good agreement with experiment (Figure 1 (bottom)).

221 At this point, all the essential interaction parameters  $\epsilon_{FG-FG}$ ,  $\epsilon_{FG-NTF2}$ , and  $\epsilon_{FG-Importin\beta}$  have been set by  
 222 quantitative comparisons between DFT and experiment. Next, we investigate the effects of crowd-  
 223 ing of one type of NTR on the system. We quantify molecular crowding through two observables:  
 224 (i) the packing fraction  $\rho^{(i)}(z)d^{(i)}$ , where  $\rho^{(i)}(z)$  is the one-dimensional number density of a particu-  
 225 lar NTR (labeled by  $i$ ), and (ii) the potential of mean force (PMF)  $W^{(i)}(z)$  of a particular NTR, in the  
 226 presence of other NTRs and the FG Nups (see Figure 2 and equation 12). For high crowding, one  
 227 expects the packing fraction of a particular NTR to increase in magnitude and for the PMF to be-  
 228 come more positive (with respect to the same system but with fewer NTRs), which is interpreted  
 229 as a greater potential barrier (or, somewhat equivalently, a shallower potential well). We observe  
 230 that both NTF2 and Imp $\beta$  display higher levels of packing and higher-amplitude density oscillations  
 231 within the Nsp1 film upon increasing their respective bulk concentrations (0.01, 0.1, 1.0, and 10.0  
 232  $\mu M$ ) (Figure 2 (top)). The density oscillations arise from layering/ordering effects mainly caused by  
 233 packing against a hard planar wall, where particles prefer to pack closer to a flat surface; the lay-  
 234 ering of hard-spheres next to a planar wall is a well known phenomenon *Patra (1999); Roth et al.*  
 235 *(2000); Deb et al. (2011)*. As is expected, in both systems, the maximum observed packing fraction  
 236 ( $\gtrsim 0.15$ ) was located close to the surface (at 10  $\mu M$ ). For the here chosen NTR-particle sizes, it is  
 237 expected that the packing fraction and PMF will be largely dictated by the interactions with the  
 238 polymers and the crowding of other NTRs, with less significant effects arising from the particular  
 239 implementation of the surface hardness. We note that the density oscillations for the Imp $\beta$  particle



240 show greater amplitudes as compared with the NTF2 particle (for the same concentration above  
241 the film), which is expected since the  $\text{Imp}\beta$  is larger in size and thus experiences more pronounced  
242 layering effects *Padmanabhan et al. (2010)*.

243 For both NTF2 and  $\text{Imp}\beta$ , the PMFs decrease in magnitude (but remain negative within the bulk  
244 of the film) upon an increase in bulk NTR concentration (Figure 2 (bottom)). Specifically, increasing  
245 the concentration in solution from 0.01 to 10.0  $\mu\text{M}$  results in an approximate two fold decrease in  
246 the absolute value of the PMF ( $|\Delta W(z)| \approx 4 - 5 k_B T$ ). The implication of this finding is that, at higher  
247 levels of packing in the film, it is relatively easier for bound NTRs to unbind from the polymer film,  
248 or, equivalently, less favourable for additional NTRs to enter the polymer film from the solution  
249 above it. This effect may primarily be attributed to the increased filling of space, *i.e.* molecular  
250 crowding, of the NTRs between the Nsp1 polymers. The results of Figure 2 are particularly relevant  
251 to the NPC “transport paradox”, where fast transport ( $\sim 1000$  transport events per second) occurs in  
252 conjunction with strong – selective – binding. Whilst there are various explanations of the transport  
253 paradox *Hoogenboom et al. (2021)*, these results show how NTR crowding may facilitate the exit of  
254 NTRs from the NPC, noting that a decrease of  $|\Delta W(z)| \approx 4 - 5 k_B T$  in PMF well depth would imply  
255 a  $\sim 100\times$  faster rate for unbinding if we assume Arrhenius-like kinetics (Figure 2 (bottom)).

256 As a next step, we explore how the competition between NTRs may affect the binding, penetra-  
257 tion, and distribution of NTRs in FG Nup assemblies. Specifically, we model the mixed crowding  
258 effects in a system containing the NTRs NTF2 and  $\text{Imp}\beta$  in an Nsp1 polymer film (see Figures 3  
259 and 4 and their respective Figure supplements). As in the case with one type of NTR, we probe  
260 the packing fractions, potentials of mean force (PMFs)  $W^{(i)}(z)$ , binding isotherms, and polymer film  
261 thickness but this time keeping the amount of one NTR fixed at a physiologically relevant concen-  
262 tration (1  $\mu\text{M}$ ) *Zahn et al. (2016)* whilst varying the concentration of the other NTR (Figure 3a). Upon  
263 increasing the bulk concentration of NTF2 from 0.01  $\mu\text{M}$  to 10.0  $\mu\text{M}$  while keeping the bulk concen-  
264 tration (in solution) of  $\text{Imp}\beta$  constant at 1  $\mu\text{M}$ , the amount of bound  $\text{Imp}\beta$  dramatically drops and  
265 the remaining bound  $\text{Imp}\beta$  is redistributed towards the surface of the Nsp1 polymer film (Figure  
266 3a (top) and Figure 3- Figure supplement 1). Additionally, the density oscillations of  $\text{Imp}\beta$  within  
267 the film, which are evident at 0.01  $\mu\text{M}$  of NTF2, smooth out upon increasing the amount of NTF2  
268 to 0.1  $\mu\text{M}$ . This shows that the presence of NTF2 directly modulates the distribution of  $\text{Imp}\beta$  within  
269 the film. Interestingly, upon increasing NTF2 from 0.1  $\mu\text{M}$  while keeping the bulk concentration of  
270  $\text{Imp}\beta$  constant, we observe NTR phase separation: an NTF2-rich phase within the FG Nup film and  
271 an  $\text{Imp}\beta$ -rich phase at the film surface.

272 When considering binary systems of hard-spheres with different diameters subject to packing  
273 between planar walls, ignoring any attractive interactions between them, one typically observes the  
274 larger particles packing closer to the wall, as compared with the smaller particles *Padmanabhan*  
275 *et al. (2010)*. This effect, as measured per unit area, is due to the overall system entropy loss being  
276 less when the larger particles pack closer to the surface, rather than the smaller ones. Here we ob-  
277 serve the opposite effect, with the (smaller) NTF2 particles remaining closer to the grafting surface,  
278 which is qualitatively consistent with a theoretical study investigating a binary mixture of attractive  
279 particles, where the larger particles were excluded for a distance from a planar surface of up to  
280 twice the particle diameter *Padmanabhan et al. (2010)*. Here, however, we observe the depletion  
281 of the larger NTR ( $\text{Imp}\beta$ ) over much larger distances (in  $z$ ) for high bulk concentrations of NTF2,  
282 apparently dictated by the polymer film thickness. The intuitive explanation is that the smaller  
283 NTF2 competes more readily for binding sites (that are spread uniformly along the polymer in our  
284 model) deep within the film, closer to the grafting surface, without paying a substantial entropic  
285 penalty for rearranging the polymers. In contrast, closer to the film surface, the larger  $\text{Imp}\beta$  binds  
286 more readily since its overall stronger binding propensity (note  $\epsilon_{\text{FG-NTF2}} \approx \epsilon_{\text{FG-Imp}\beta}$ , spread over a  
287 larger particle surface for  $\text{Imp}\beta$ ) where the polymers are more diffuse. Indeed, the distribution  
288 of NTF2 in the film largely follows the polymer density as a function of distance from the grafting  
289 surface, indicating that with its smaller size, NTF2 benefits more from the enhanced concentration  
290 of polymer beads (and therewith of binding sites) without having to pay a substantial entropic cost

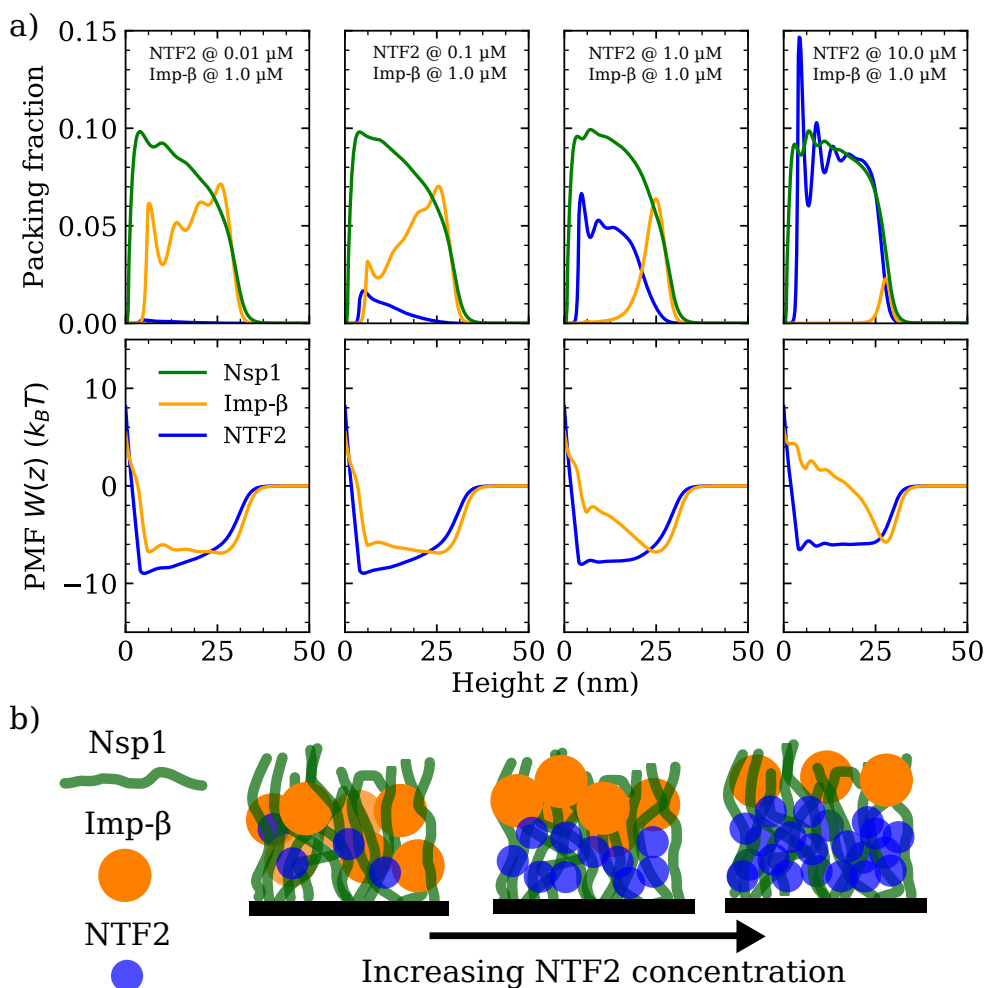

**Figure 3.** Phase separation in a ternary FG Nup-NTR polymer film assembly. **a)** DFT Packing fractions and accompanying potentials of mean force (PMFs) for Nsp1 polymer films in the presence of NTF2 and Importin- $\beta$  (Imp- $\beta$ ). The concentration (in solution) of NTF2 is increased from 0.01-10.0  $\mu\text{M}$  (left to right panels), whilst the concentration of Imp- $\beta$  is fixed at 1.0  $\mu\text{M}$ . The cohesion strengths used here are  $\{\epsilon_{\text{FG-FG}} = 0.275, \epsilon_{\text{FG-NTF2}} = 2.4, \epsilon_{\text{FG-Imp}\beta} = 2.3\} k_{\text{B}}T$  for the Nsp1-Nsp1, Nsp1-NTF2, and Nsp1 - Imp- $\beta$  interactions respectively. **b)** Cartoon visualisation of the data from (a) depicting the increasing concentration of NTF2 pushing Imp- $\beta$  to the top of the Nsp1 layer, also resulting in significant expulsion of Imp- $\beta$  from the film into the bulk.

**Figure 3-Figure supplement 1.** NTR binding isotherms and Nsp1 film thicknesses as a function of NTF2 concentration in solution.

291 (as for Imp- $\beta$ ) for penetrating the polymer film.

292 Throughout the changes in incorporation of NTF2, the density of the polymers did not show  
 293 noticeable changes. The modulation of Imp- $\beta$  via changes in NTF2 numbers is also articulated in  
 294 terms of the PMF  $W(z)$ , where the Imp- $\beta$  PMF is an approximate square well at 0.01  $\mu\text{M}$  of NTF2, but  
 295 for higher NTF2 concentrations gradually transforms into a pronounced and sharper well located  
 296 at  $z \approx 25.0$  nm, *i.e.*, at the surface of the film, with the formation of a barrier to enter the rest of the  
 297 film (Figure 3a (bottom)).

298 Finally, we verified if similar effects resulted when increasing the concentration of Imp- $\beta$  for a  
 299 given, constant, NTF2 concentration set at 1.0  $\mu\text{M}$  (see Figure 4a and Figure 4- Figure supplement  
 300 1). We observe no significant change to the Nsp1 or NTF2 packing fractions (including the PMF and  
 301 binding isotherm) upon increasing the concentration of Imp- $\beta$  in solution from 0.01-1.0  $\mu\text{M}$  (see also  
 302 Figure 4b). We have not explored high bulk concentrations ( $> 1$   $\mu\text{M}$ ) of Imp- $\beta$ , as these yield highly

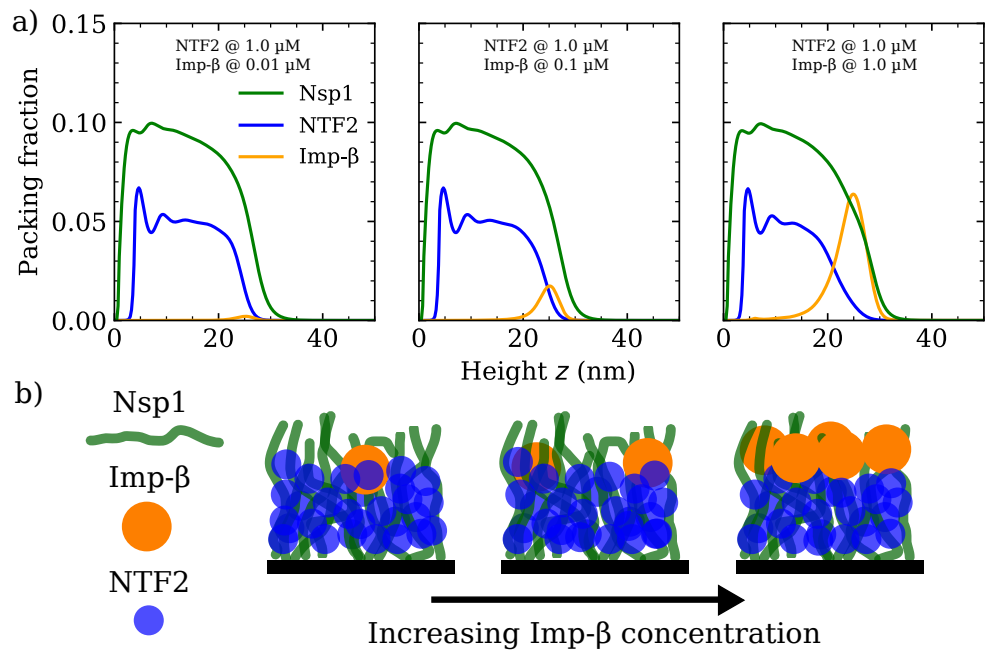

**Figure 4.** Increasing Importin- $\beta$  (Imp $\beta$ ) concentration negligibly affects NTF2 in the Nsp1 film. **a)** DFT packing fractions against the height above the flat surface  $z$  for Nsp1, NTF2, and Imp $\beta$ . The concentration of Imp $\beta$  is increased from 0.01-10  $\mu$ M (left to right panels) whilst the NTF2 concentration remains fixed at 1.0  $\mu$ M. The last panel (furthest to the right) is the same as the second last panel in Figure 3a. **b)** Cartoon illustration visualising the data in (a) depicting the undetectable change in the packing/morphology of the NTF2 in the presence of increasing Imp $\beta$  molecules.

**Figure 4-Figure supplement 1.** NTR binding isotherms and Nsp1 film thicknesses as a function of Importin- $\beta$  concentration in solution.

303 oscillatory packing fractions and therewith are computationally more challenging in our DFT model.  
 304 However, we expect that further incorporation of Imp $\beta$  would eventually change the distribution  
 305 of NTF2 in the film.

### 306 Discussion

307 We have made quantitative predictions regarding the effects of mixed crowding on the binding of  
 308 different NTRs to FG Nup planar assemblies. Our results are based on a minimal coarse-grained  
 309 model implemented in a mean-field theory approach, which treats FG Nups as sticky and flexible  
 310 homopolymers and NTRs as isotropic and cohesive spheres. Firstly, the model includes three inter-  
 311 action parameters, corresponding to the cohesive interactions between FG Nups and NTRs: these  
 312 were parametrized using experimental data for Nsp1 film assemblies and binding thereto of one  
 313 type of NTR (NTF2 or Imp $\beta$ ).

314 Based on the thus parametrized model, we have shown that increased crowding of one type  
 315 of NTR results in a shallower potential well within the film, implying that individual NTRs will have  
 316 a small potential barrier to leaving the film in the presence of more NTRs. The origin of this ef-  
 317 fect is due to an interplay between the further occupation of volume within the film (entropic) and  
 318 the increased competition for binding sites. This result has important implications for the NPC:  
 319 when there is a large influx of material into the channel from either the cytoplasm or nucleoplasm,  
 320 the exit of said material should be faster since the increased crowding effects will reduce the free  
 321 energy barrier – thus increasing the likelihood – to leave the pore, with a predicted increase in un-  
 322 binding rates of two orders of magnitude in the concentration range explored here. While we note  
 323 that there are multiple factors involved in determining transport speed *Hoogenboom et al. (2021)*,  
 324 this scenario highlights the importance of NTRs as an essential component in the NPC transport

325 barrier *Lim et al. (2015)* and, specifically, implies that the NPC could perform more efficiently and  
326 faster with higher numbers of NTRs present in its inner channel, as has indeed been observed in  
327 experiments with Imp $\beta$  *Yang and Musser (2006)*.

328 We found that with increased incorporation of NTF2 within the FG Nup film, the amount of  
329 absorbed Imp $\beta$  was reduced and its distribution within the film was changed. For similar and phys-  
330 iologically relevant concentrations of the NTRs studied here, phase separation was observed, with  
331 an NTF2-rich phase at the bottom of the film (where the polymer packing is higher) and an Imp $\beta$ -  
332 rich phase at the top of the film (where the polymer packing is lower). It is important to note that  
333 this particular height dependent phase separation, as predicted in our minimal one dimensional  
334 model (assuming symmetry parallel to the anchoring surface), might not be the only way NTRs  
335 spatially segregate. Therefore, it would be interesting to extend the model developed here to two  
336 or three dimensions, relaxing the lateral symmetry assumption (see *Osmanović et al. (2013b)*). Ad-  
337 ditionally, future developments of our approach could explore the implications that mixed NTR  
338 crowding has on kinetics, with careful considerations of how one coarse-grains the sequence het-  
339 erogeneity of FG Nups and the patchiness of the NTRs as this is important for kinetics *Davis et al.*  
340 *(2021)*.

341 Given that there is a stable population of Imp $\beta$  in the NPC barrier and given that changes to  
342 this population affect the selective properties of the NPC *Lowe et al. (2015)*, our results suggest  
343 that NTR crowding plays a substantial role in determining the performance of the NPC barrier. Ad-  
344 ditionally, the observation of a phase-separated state between two distinct NTRs has implications  
345 on how the NPC maintains high-throughput transport despite high NTR densities. Consistent with  
346 experimental observations on NPCs *Lowe et al. (2015)*, Imp $\beta$  is found to occupy regions of lower  
347 FG Nup density (as shown here in planar FG Nup assemblies), where our results here demonstrate  
348 that such a distribution of Imp $\beta$  can at least in part be attributed to competitive binding of other,  
349 smaller NTRs to regions of higher FG Nup density. Future work could explore mixed crowding in  
350 the pore geometry of the NPC where the FG Nup density decreases with a growing radial distance  
351 away from the center of the pore, giving rise to a possible – radially dependent – phase separation  
352 in the NPC. An immediate consequence of this is that transport pathways through the NPC are  
353 most likely dependent on the type of NTR, with potentially separate transport pathways mediated  
354 and modulated by different NTRs.

## 355 Acknowledgments

356 We thank Dino Osmanović, Anton Zilman, and Anđela Šarić for discussions. We thank Ralf Richter  
357 for providing feedback on the manuscript. L.K.D. acknowledges the biophysics research computing  
358 cluster at UCL that was used to perform the simulations and analysis. This work was funded by the  
359 UK Engineering and Physical Sciences Research Council (EP/L504889/1, L.K.D. and B.W.H.).

## 360 References

- 361 Aitchison, J. D. and Rout, M. P. (2012). The yeast nuclear pore complex and transport through it. *Genetics*,  
362 190(3):855–883.
- 363 Alberts, B. (1994). *Molecular biology of the cell*. Garland, New York, 3rd ed. edition.
- 364 Davis, L. K., Ford, I. J., Šarić, A., and Hoogenboom, B. W. (2020). Intrinsically disordered nuclear pore proteins  
365 show ideal-polymer morphologies and dynamics. *Phys. Rev. E*, 101:022420.
- 366 Davis, L. K., Šarić, A., Hoogenboom, B. W., and Zilman, A. (2021). Physical modeling of multivalent interactions  
367 in the nuclear pore complex. *Biophysical Journal*, 120(9):1565–1577.
- 368 Deb, D., Winkler, A., Yamani, M. H., Oettel, M., Virnau, P., and Binder, K. (2011). Hard sphere fluids at a soft  
369 repulsive wall: A comparative study using monte carlo and density functional methods. *Journal of Chemical*  
370 *Physics*, 134(21):214706.

- 371 Eisele, N. B., Andersson, F. I., Frey, S., and Richter, R. P. (2012). Viscoelasticity of thin biomolecular films: A  
372 case study on nucleoporin phenylalanine-glycine repeats grafted to a histidine-tag capturing QCM-D sensor.  
373 *Biomacromolecules*, 13(8):2322–2332.
- 374 Eisele, N. B., Frey, S., Piehler, J., Görlich, D., and Richter, R. P. (2010). Ultrathin nucleoporin phenylalanine-glycine  
375 repeat films and their interaction with nuclear transport receptors. *EMBO Rep.*, 11(5):366–372.
- 376 Fiserova, J., Richards, S. A., Wentz, S. R., and Goldberg, M. W. (2010). Facilitated transport and diffusion take  
377 distinct spatial routes through the nuclear pore complex. *J Cell Sci*, 123(Pt 16):2773–2780.
- 378 Fisher, P. D. E., Shen, Q., Akpınar, B., Davis, L. K., Chung, K. K. H., Baddeley, D., Šarić, A., Melia, T. J., Hoogenboom,  
379 B. W., Lin, C., and Lusk, C. P. (2018). A programmable DNA origami platform for organizing intrinsically  
380 disordered nucleoporins within nanopore confinement. *ACS Nano*, 12(2):1508–1518.
- 381 Frey, S., Rees, R., Schünemann, J., Ng, S. C., Fünfgeld, K., Huyton, T., and Görlich, D. (2018). Surface properties  
382 determining passage rates of proteins through nuclear pores. *Cell*, 174(1):202–217.e9.
- 383 Gamini, R., Han, W., Stone, J. E., and Schulten, K. (2014). Assembly of nsp1 nucleoporins provides insight into  
384 nuclear pore complex gating. *PLoS Computational Biology*, 10(3):e1003488.
- 385 Ghavami, A., der Giessen, E. V., and Onck, P. R. (2018). Sol–gel transition in solutions of FG-nups of the nuclear  
386 pore complex. *Extreme Mechanics Letters*, 22:36–41.
- 387 Ghavami, A., van der Giessen, E., and Onck, P. R. (2012). Coarse-grained potentials for local interactions in  
388 unfolded proteins. *Journal of Chemical Theory and Computation*, 9(1):432–440.
- 389 Ghavami, A., van der Giessen, E., and Onck, P. R. (2016). Energetics of transport through the nuclear pore  
390 complex. *PLOS ONE*, 11(2):e0148876.
- 391 Ghavami, A., Veenhoff, L. M., van der Giessen, E., and Onck, P. R. (2014). Probing the disordered domain  
392 of the nuclear pore complex through coarse-grained molecular dynamics simulations. *Biophysical Journal*,  
393 107(6):1393–1402.
- 394 Hayama, R., Sorci, M., IV, J. J. K., Hecht, L. M., Plawsky, J. L., Belfort, G., Chait, B. T., and Rout, M. P. (2019).  
395 Interactions of nuclear transport factors and surface-conjugated FG nucleoporins: Insights and limitations.  
396 *PLOS ONE*, 14(6):e0217897.
- 397 Hayama, R., Sparks, S., Hecht, L. M., Dutta, K., Karp, J. M., Cabana, C. M., Rout, M. P., and Cowburn, D. (2018).  
398 Thermodynamic characterization of the multivalent interactions underlying rapid and selective translocation  
399 through the nuclear pore complex. *Journal of Biological Chemistry*, 293(12):4555–4563.
- 400 Hoogenboom, B. W., Hough, L. E., Lemke, E. A., Lim, R. Y., Onck, P. R., and Zilman, A. (2021). Physics of the  
401 nuclear pore complex: Theory, modeling and experiment. *Physics Reports*, 921:1–53.
- 402 Jovanovic-Talisman, T., Tetenbaum-Novatt, J., McKenney, A. S., Zilman, A., Peters, R., Rout, M. P., and Chait,  
403 B. T. (2009). Artificial nanopores that mimic the transport selectivity of the nuclear pore complex. *Nature*,  
404 457(7232):1023–1027.
- 405 Jovanovic-Talisman, T. and Zilman, A. (2017). Protein Transport by the Nuclear Pore Complex: Simple Biophysics  
406 of a Complex Biomachine. *Biophys. J.*, 113(1):6–14.
- 407 Kapinos, L. E., Huang, B., Rencurel, C., and Lim, R. Y. (2017). Karyopherins regulate nuclear pore complex barrier  
408 and transport function. *Journal of Cell Biology*, 216(11):3609–3624.
- 409 Kapinos, L. E., Schoch, R. L., Wagner, R. S., Schleicher, K. D., and Lim, R. Y. H. (2014). Karyopherin-centric control  
410 of nuclear pores based on molecular occupancy and kinetic analysis of multivalent binding with FG nucleo-  
411 porins. *Biophys. J.*, 106(8):1751–1762.
- 412 Kapon, R., Topchik, A., Mukamel, D., and Reich, Z. (2008). A possible mechanism for self-coordination of bidi-  
413 rectional traffic across nuclear pores. *Physical Biology*, 5(3):036001.
- 414 Keminer, O. and Peters, R. (1999). Permeability of single nuclear pores. *Biophysical Journal*, 77(1):217–228.
- 415 Kim, J., Izadyar, A., Nioradze, N., and Amemiya, S. (2013). Nanoscale mechanism of molecular transport through  
416 the nuclear pore complex as studied by scanning electrochemical microscopy. *Journal of the American Chem-  
417 ical Society*, 135(6):2321–2329.

- 418 Kim, S. J., Fernandez-Martinez, J., Nudelman, I., Shi, Y., Zhang, W., Raveh, B., Herricks, T., Slaughter, B. D., Hogan,  
419 J. A., Upla, P., Chemmama, I. E., Pellarin, R., Echeverria, I., Shivaraju, M., Chaudhury, A. S., Wang, J., Williams,  
420 R., Unruh, J. R., Greenberg, C. H., Jacobs, E. Y., Yu, Z., de la Cruz, M. J., Mironska, R., Stokes, D. L., Aitchison,  
421 J. D., Jarrold, M. F., Gerton, J. L., Ludtke, S. J., Akey, C. W., Chait, B. T., Sali, A., and Rout, M. P. (2018). Integrative  
422 structure and functional anatomy of a nuclear pore complex. *Nature*, 555(7697):475–482.
- 423 Kumeta, M., Yamaguchi, H., Yoshimura, S. H., and Takeyasu, K. (2012). Karyopherin-independent spontaneous  
424 transport of amphiphilic proteins through the nuclear pore. *Journal of Cell Science*, 125(21):4979–4984.
- 425 Lim, R. Y. H., Huang, B., and Kapinos, L. E. (2015). How to operate a nuclear pore complex by kap-centric control.  
426 *Nucleus*, 6(5):366–372.
- 427 Lim, R. Y. H., Huang, N.-P., Koser, J., Deng, J., Lau, K. H. A., Schwarz-Herion, K., Fahrenkrog, B., and Aebi, U. (2006).  
428 Flexible phenylalanine-glycine nucleoporins as entropic barriers to nucleocytoplasmic transport. *Proc. Natl.  
429 Acad. Sci.*, 103(25):9512–9517.
- 430 Lowe, A. R., Tang, J. H., Yassif, J., Graf, M., Huang, W. Y., Groves, J. T., Weis, K., and Liphardt, J. T. (2015). Importin- $\beta$   
431 modulates the permeability of the nuclear pore complex in a ran-dependent manner. *eLife*, 4:e04052.
- 432 Ma, J., Goryaynov, A., Sarma, A., and Yang, W. (2012). Self-regulated viscous channel in the nuclear pore complex.  
433 *Proceedings of the National Academy of Sciences*, 109(19):7326–7331.
- 434 Ma, J., Goryaynov, A., and Yang, W. (2016). Super-resolution 3d tomography of interactions and competition in  
435 the nuclear pore complex. *Nature Structural & Molecular Biology*, 23(3):239–247.
- 436 Miao, L. and Schulten, K. (2009). Transport-related structures and processes of the nuclear pore complex  
437 studied through molecular dynamics. *Structure*, 17(3):449–459.
- 438 Mohr, D., Frey, S., Fischer, T., Güttler, T., and Görlich, D. (2009). Characterisation of the passive permeability  
439 barrier of nuclear pore complexes. *The EMBO Journal*, 28(17):2541–2553.
- 440 Moussavi-Baygi, R., Jamali, Y., Karimi, R., and Mofrad, M. R. K. (2011). Brownian dynamics simulation of nucle-  
441 cytoplasmic transport: a coarse-grained model for the functional state of the nuclear pore complex. *PLoS  
442 Comput. Biol.*, 7(6):e1002049.
- 443 Naim, B., Brumfeld, V., Kapon, R., Kiss, V., Nevo, R., and Reich, Z. (2007). Passive and facilitated transport in  
444 nuclear pore complexes is largely uncoupled. *Journal of Biological Chemistry*, 282(6):3881–3888.
- 445 Osmanović, D., Bailey, J., Harker, A. H., Fassati, A., Hoogenboom, B. W., and Ford, I. J. (2012). Bistable collective  
446 behavior of polymers tethered in a nanopore. *Phys. Rev. E - Stat. Nonlinear, Soft Matter Phys.*, 85(6):1–8.
- 447 Osmanović, D., Fassati, A., Ford, I. J., and Hoogenboom, B. W. (2013a). Physical modelling of the nuclear pore  
448 complex. *Soft Matter*, 9(44):10442–10451.
- 449 Osmanović, D., Ford, I. J., and Hoogenboom, B. W. (2013b). Model inspired by nuclear pore complex suggests  
450 possible roles for nuclear transport receptors in determining its structure. *Biophys. J.*, 105(12):2781–2789.
- 451 Padmanabhan, V., Frischknecht, A. L., and Mackay, M. E. (2010). Binary fluid with attractions near a planar wall.  
452 *Physical Review E*, 82(2).
- 453 Paine, P. L., Moore, L. C., and Horowitz, S. B. (1975). Nuclear envelope permeability. *Nature*, 254(5496):109–114.
- 454 Patra, C. N. (1999). Structure of binary hard-sphere mixtures near a hard wall: A simple weighted-density-  
455 functional approach. *Journal of Chemical Physics*, 111(14):6573–6578.
- 456 Popken, P., Ghavami, A., Onck, P. R., Poolman, B., and Veenhoff, L. M. (2015). Size-dependent leak of soluble and  
457 membrane proteins through the yeast nuclear pore complex. *Molecular Biology of the Cell*, 26(7):1386–1394.
- 458 Raveh, B., Karp, J. M., Sparks, S., Dutta, K., Rout, M. P., Sali, A., and Cowburn, D. (2016). Slide-and-exchange  
459 mechanism for rapid and selective transport through the nuclear pore complex. *Proceedings of the National  
460 Academy of Sciences*, 113(18):E2489–E2497.
- 461 Roth, R. (2010). Fundamental measure theory for hard-sphere mixtures: a review. *J. Phys. Condens. Matter*,  
462 22:063102.
- 463 Roth, R., Evans, R., and Dietrich, S. (2000). Depletion potential in hard-sphere mixtures: Theory and applications.  
464 *Phys. Rev. E*, 62:5360–5377.

- 465 Roth, R., Evans, R., Lang, A., and Kahl, G. (2002). Fundamental measure theory for hard-sphere mixtures revisited: The white bear version. *J. Phys. Condens. Matter*, 14(46):12063–12078.
- 466
- 467 Roth, R. and Kinoshita, M. (2006). Depletion potential between large spheres immersed in a multicomponent mixture of small spheres. *Journal of Chemical Physics*, 125(8):084910.
- 468
- 469 Schmidt, H. B. and Görlich, D. (2016). Transport selectivity of nuclear pores, phase separation, and membraneless organelles. *Trends in Biochemical Sciences*, 41(1):46–61.
- 470
- 471 Schmidt, H. B. and Görlich, D. (2015). Nup98 FG domains from diverse species spontaneously phase-separate into particles with nuclear pore-like permselectivity. *eLife*, 4:e04251.
- 472
- 473 Schoch, R. L., Kapinos, L. E., and Lim, R. Y. H. (2012). Nuclear transport receptor binding avidity triggers a self-healing collapse transition in FG-nucleoporin molecular brushes. *Proc. Natl. Acad. Sci.*, 109(42):16911–16916.
- 474
- 475 Shah, S. and Forbes, D. J. (1998). Separate nuclear import pathways converge on the nucleoporin nup153 and can be dissected with dominant-negative inhibitors. *Current Biology*, 8(25):1376–1386.
- 476
- 477 Stanley, G. J., Fassati, A., and Hoogenboom, B. W. (2017). Biomechanics of the transport barrier in the nuclear pore complex. *Semin. Cell Dev. Biol.*, 68:42–51.
- 478
- 479 Tagliazucchi, M. and Szleifer, I. (2015). Transport mechanisms in nanopores and nanochannels: Can we mimic nature? *Mater. Today*, 18(3):131–142.
- 480
- 481 Timney, B. L., Raveh, B., Mironska, R., Trivedi, J. M., Kim, S. J., Russel, D., Wente, S. R., Sali, A., and Rout, M. P. (2016). Simple rules for passive diffusion through the nuclear pore complex. *Journal of Cell Biology*, 215(1):57–76.
- 482
- 483
- 484 Vovk, A., Gu, C., Opferman, M. G., Kapinos, L. E., Lim, R. Y. H., Coalson, R. D., Jasnow, D., and Zilman, A. (2016). Simple biophysics underpins collective conformations of the intrinsically disordered proteins of the Nuclear Pore Complex. *Elife*, 5:e10785.
- 485
- 486
- 487 Wagner, R. S., Kapinos, L. E., Marshall, N. J., Stewart, M., and Lim, R. Y. H. (2015). Promiscuous binding of karyopherin $\beta$ 1 modulates FG nucleoporin barrier function and expedites NTF2 transport kinetics. *Biophys. J.*, 108(4):918–927.
- 488
- 489
- 490 Wente, S. R. (2000). Gatekeepers of the nucleus. *Science*, 288(5470):1374–1377.
- 491
- 492 Yamada, J., Phillips, J. L., Patel, S., Goldfien, G., Calestagne-Morelli, A., Huang, H., Reza, R., Acheson, J., Krishnan, V. V., Newsam, S., Gopinathan, A., Lau, E. Y., Colvin, M. E., Uversky, V. N., and Rexach, M. F. (2010). A bimodal distribution of two distinct categories of intrinsically disordered structures with separate functions in FG nucleoporins. *Molecular & Cellular Proteomics*, 9(10):2205–2224.
- 493
- 494
- 495 Yang, W. and Musser, S. M. (2006). Nuclear import time and transport efficiency depend on importin beta concentration. *Journal of Cell Biology*, 174(7):951–961.
- 496
- 497 Yu, Y. X. and Wu, J. (2002). Density functional theory for inhomogeneous mixtures of polymeric fluids. *J. Chem. Phys.*, 117(5):2368–2376.
- 498
- 499 Zahn, R., Ehret, S., Callis, C. A., Osmanović, D., Frey, S., Stewart, M., You, C., Görlich, D., Richter, R. P., and Hoogenboom, B. W. (2016). A physical model describing the interaction of nuclear transport receptors with FG nucleoporin domain assemblies. *Elife*, 5:e14119.
- 500
- 501

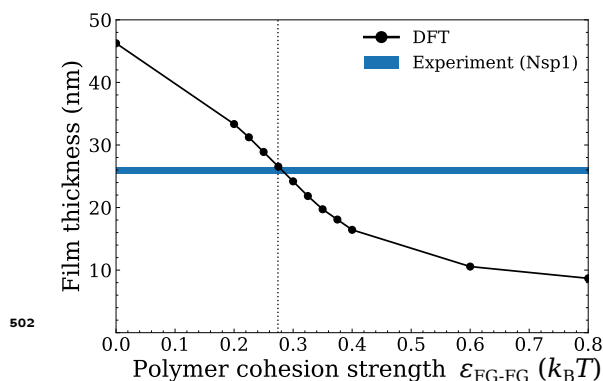

**Figure 1-Figure supplement 1.** Setting the polymer-polymer cohesion parameter  $\epsilon_{FG-FG}$  through comparison of film thicknesses as calculated from DFT, *i.e.*, the height including 95% of polymer density, with the film thickness of an Nsp1 film assembly as derived from experiment ( $25.9 \pm 0.5$  nm) *Zahn et al. (2016)*. The grafting density of Nsp1 to the flat surface in DFT was set so as to best match the density used in experiments ( $4.9 \text{ pmol/cm}^2 \approx 3.3 \text{ polymers/100nm}^2$ ). The vertical dotted line corresponds to the interpolated  $\epsilon_{FG-FG} = 0.275 k_B T$  for which the DFT best matches the experimental thickness.

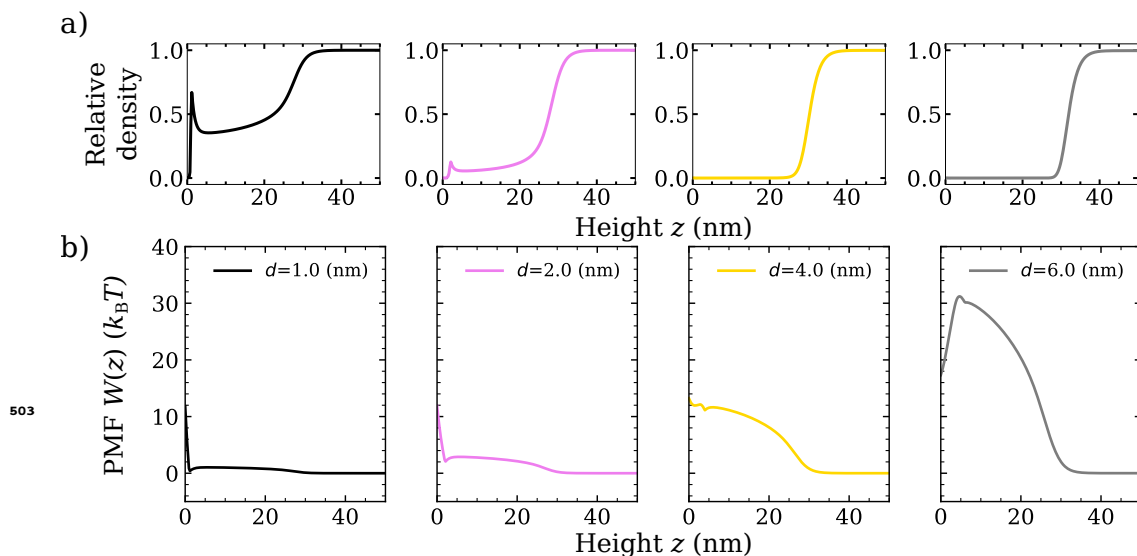

**Figure 1-Figure supplement 2.** Quantification of entry (to the Nsp1 film) barriers for non-cohesive particles with varying diameters  $d$ . **a)** Relative density (normalized to the bulk value occurring at  $z \geq 40$  nm) of non-cohesive particles with diameters  $d = 1.0$  nm (black),  $d = 2.0$  nm (pink),  $d = 4.0$  nm (gold),  $d = 6.0$  nm (grey) as calculated in classical density functional theory (DFT). **b)** Potential of mean force (PMF) as a function of the height above the flat surface  $z$ . The concentration of the particles in the solution is  $10.0 \mu\text{M}$  for all panels. The polymer-polymer cohesion strength is  $\epsilon_{FG-FG} = 0.275 k_B T$ , as set through comparison with an experimental Nsp1 film.



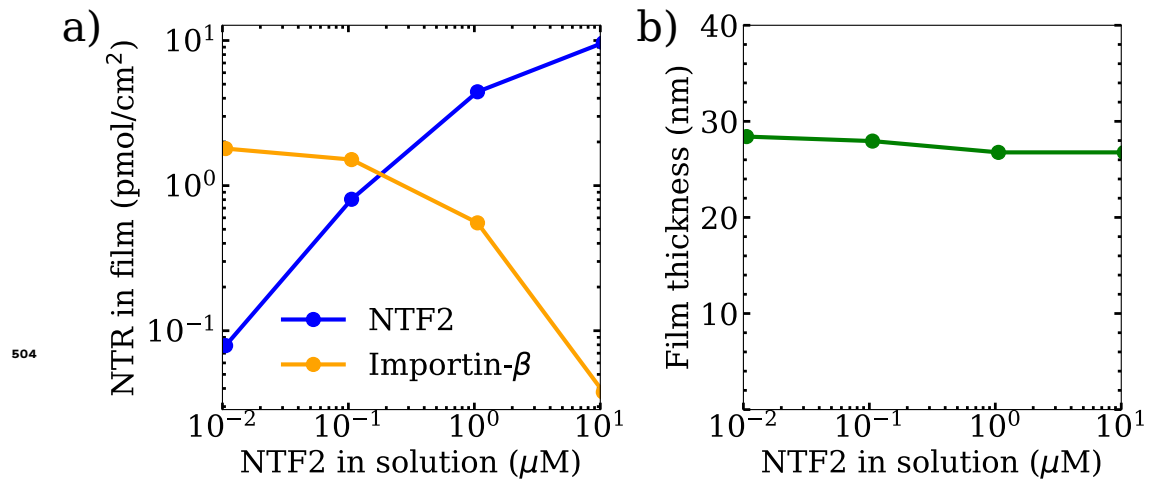

**Figure 3-Figure supplement 1.** NTR binding isotherms and Nsp1 film thicknesses as a function of NTF2 concentration in solution. **a)** Binding isotherms as predicted from the classical density functional (DFT) model for NTF2 and Importin-β. **b)** Concomitant film thickness of the FG Nup (Nsp1) layer as found in DFT. The cohesion strengths used here are  $\{\epsilon_{FG-FG} = 0.275, \epsilon_{FG-NTF2} = 2.4, \epsilon_{FG-Importin-\beta} = 2.3\} k_B T$  for the Nsp1-Nsp1, Nsp1-NTF2, and Nsp1 - Impβ interactions respectively. In each plot the concentration of Importin-β in solution remained – approximately – fixed at 1 μM.

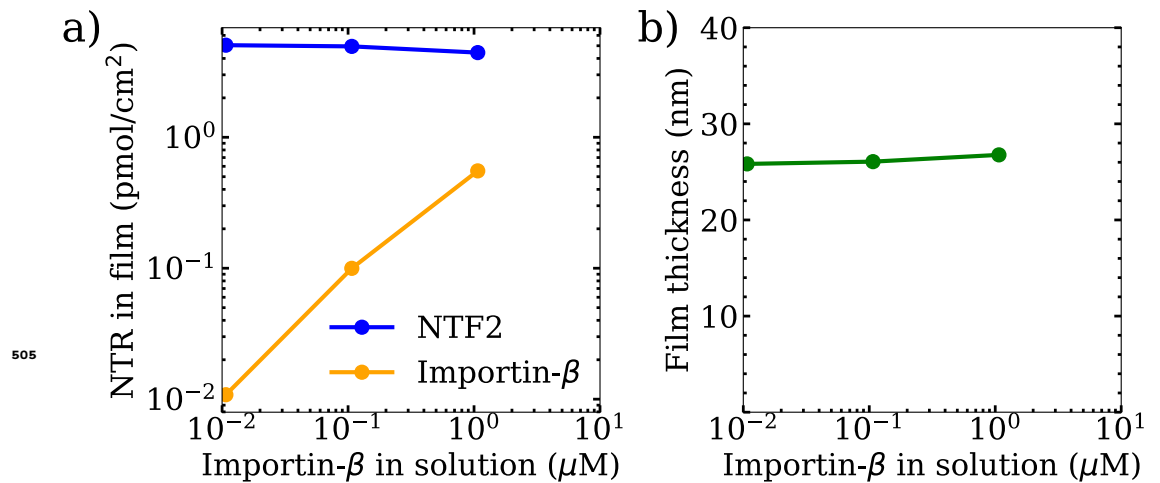

**Figure 4-Figure supplement 1.** NTR binding isotherms and Nsp1 film thicknesses as a function of Importin-β concentration in solution. **a)** Binding isotherms as predicted from the classical density functional (DFT) model for NTF2 and Importin-β. **b)** Concomitant film thickness of the FG Nup (Nsp1) layer as found in DFT. The cohesion strengths used here are  $\{\epsilon_{FG-FG} = 0.275, \epsilon_{FG-NTF2} = 2.4, \epsilon_{FG-Importin-\beta} = 2.3\} k_B T$  for the Nsp1-Nsp1, Nsp1-NTF2, and Nsp1 - Impβ interactions respectively. In each plot the concentration of NTF2 in solution remained – approximately – fixed at 1 μM.
